# Supplementary material for: Crocin Suppresses LPS-Stimulated Expression of Inducible Nitric Oxide Synthase by Upregulation of Heme Oxygenase-1 via Calcium/Calmodulin-Dependent Protein Kinase 4
Source: PubMed Central journal article supplement (PMC4009253; doi:10.1155/2014/728709), 2014-04-15

## Supplementary Figure legends

**Supplementary Fig. 1. Effects of crocin on HO-1 induction, NO production and iNOS expression in murine peritoneal macrophages.** TG-elicited mouse peritoneal macrophages were incubated with the indicated concentrations of crocin for 6 h (A) or 500  $\mu$ M crocin for various periods (B). HO-1 protein levels were analyzed by Western blotting. (C) Cells were incubated with the indicated concentrations of crocin for 3 h and then stimulated with LPS (0.1  $\mu$ g/ml) for 24 h. The supernatant was subsequently harvested and the amount of nitrite released from cells was measured by the Griess method (A). \*  $p < 0.05$  vs. the group treated with LPS alone (no crocin). (D) Equal amounts of cytosolic extract in remaining cells were analyzed by Western blotting.

**Supplementary Fig. 2. Inhibitory effects of crocin on DNA binding activity of NF- $\kappa$ B and I $\kappa$ B- $\alpha$  degradation in LPS-stimulated macrophages.** (A) RAW 264.7 cells were incubated with the indicated concentrations of crocin for 3 h and then stimulated with LPS (0.1  $\mu$ g/ml) for 30 min, after which nuclear proteins were analyzed by electron mobility shift assay (EMSA) with NF- $\kappa$ B-specific probe. ns, non-specific band; fp, free probe. (B) Cells were treated with the indicated concentrations of crocin for 3 h and then stimulated with LPS (0.1  $\mu$ g/ml) for 15 min. Equal amounts of cytosolic proteins were analyzed by Western blotting.

**Supplementary Fig. 3. Effects of crocin on DNA binding activity of Nrf2.** RAW 264.7

cells were incubated with the indicated concentrations of crocin for 3 h, and nuclear proteins were then extracted and analyzed by EMSA with Nrf2-specific probe. ns, non-specific band; fp, free probe.

**Supplementary Fig. 4. Effects of crocin and CAMK4 on activity of ERK and JNK. (A)**

RAW 264.7 cells were incubated with crocin (500  $\mu$ M) for the indicated times. (B) Cells were transfected with CAMK4 siRNA or control siRNA and then treated with crocin (500  $\mu$ M) for 1 h. (C) Cells were transfected with pcDNA3.1 (mock, M), CAMK4 constitutive active (dCT) or kinase dead (K75E) construct and then treated with crocin (500  $\mu$ M) for 1 h. Phosphorylation of ERK and JNK was analyzed by Western blotting.

**Supplementary Fig. 5. Effects of CAMK inhibitors on crocin-mediated HO-1**

**expression.** RAW 264.7 cells were incubated with KN62, KN93 or KN92 (10 or 20  $\mu$ M, respectively) for 1 h and then treated with crocin (500  $\mu$ M) for 6 h. Equal amounts of cytosolic proteins were then analyzed by Western blotting. The intensity of each band relative to tubulin (fold of control) is indicated in parentheses.

# Kim *et al.*, Supplementary Fig. 1.

A

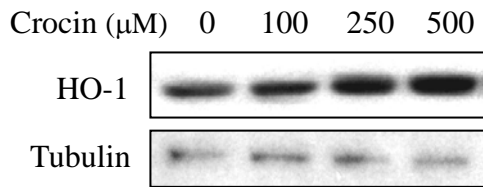

B

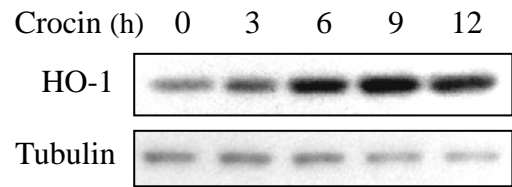

C

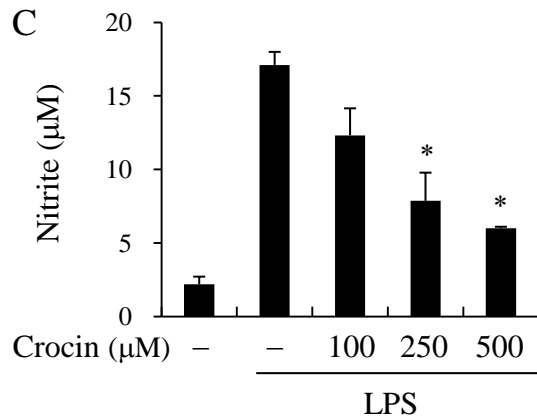

D

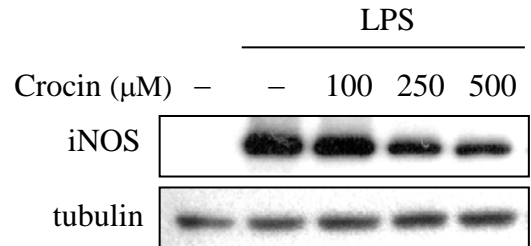

# Kim *et al.*, Supplementary Fig. 2

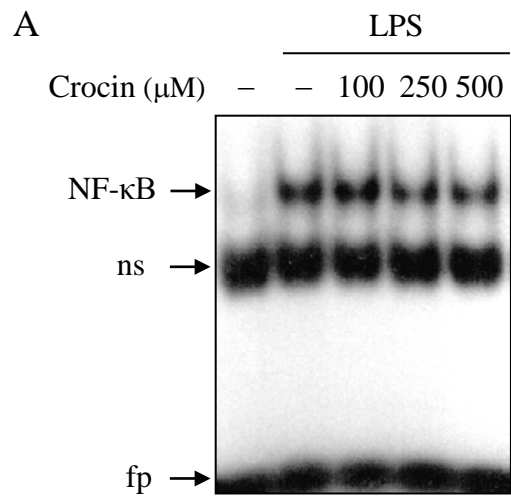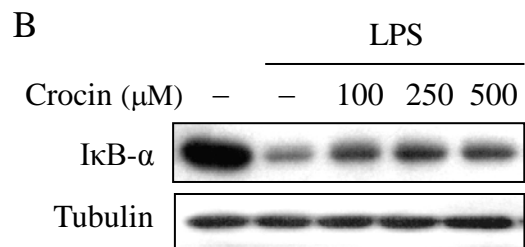

# Kim *et al.*, Supplementary Fig. 3.

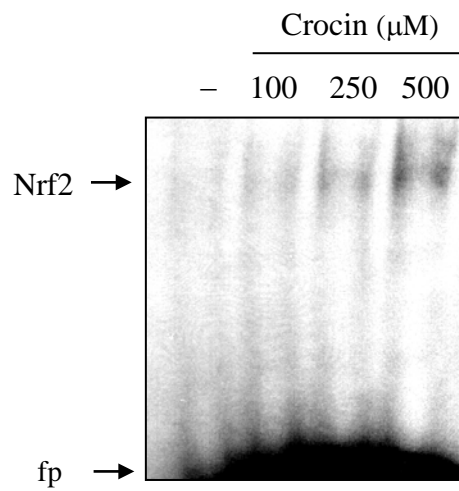

# Kim *et al.*, Supplementary Fig. 4.

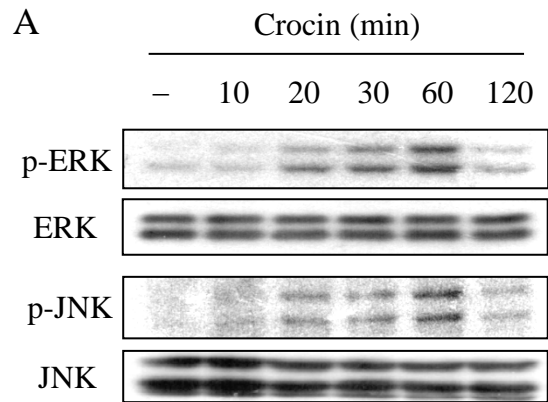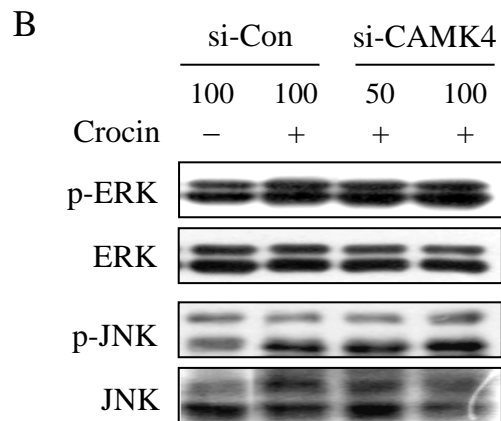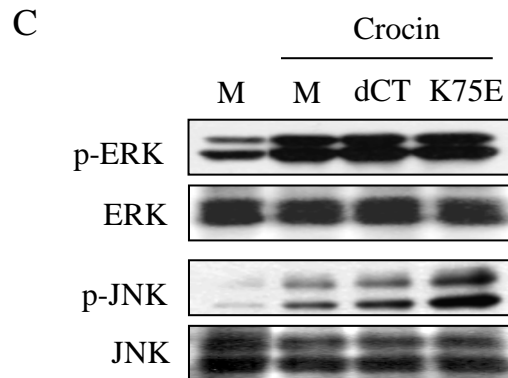

# Kim *et al.*, Supplementary Fig. 5.

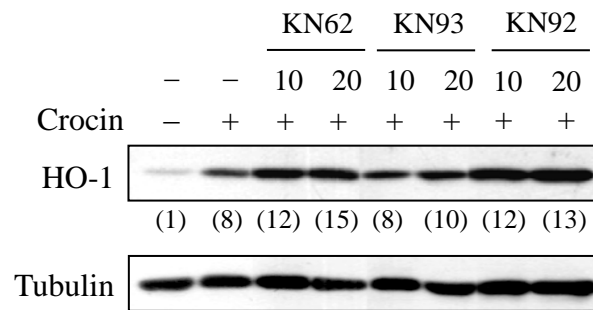

Supplement: 728709.f1.pdf [file 728709.f1.pdf]
